416

# LV only fusion pacing CRT without RV lead induces size and shape LA reverse remodelling

Vacarescu C.<sup>1</sup>; Petrescu L.<sup>2</sup>; Luca CT.<sup>3</sup>; Mornos C.<sup>2</sup>; Gurgu A.<sup>3</sup>; Goanta EV.<sup>1</sup>; Crisan S.<sup>1</sup>; Lazar MA.<sup>1</sup>; Cozliac RA.<sup>1</sup>; Cozma D.<sup>1</sup>

<sup>1</sup>University of Medicine Victor Babes, Cardiology , Timisoara, Romania

<sup>2</sup>University of Medicine Victor Babes, Cardiology Department, Timisoara, Romania

<sup>3</sup>Timisoara Institute of Cardiovascular Medicine, Timisoara, Romania

**Background:** Adaptive CRT pacing induces significant left atrium (LA) reverse remodelling comparing to biventricular (BiV) pacing, although the algorithm delivers compulsory BiV pacing in heart rate over 100/min! Purpose: to assess LA remodelling in LV only pacing without RV lead in a real-life situation of permanent CRT fusion pacing.

**Methods:** Prospective data were analysed from a cohort of patients with CRT-P indication implanted with right atrium/left ventricle (RA/LV) DDD pacing system. Complete follow-up at every 6 months included device interrogation, exercise test, transthoracic echocardiography (TE) and individualised drug optimisation. LA evaluation included: parasternal dimension (LAd), 4 chambers view: mid-LA transverse diameter (LAt), basal LA maximal transverse diameter (LAb); volume (LA vol) and shape assessment: trapezoidal LA shape was defined by LAt less than Lab, the reverse situation was considered ellipsoidal shape.

**Results:** 55 pts (30 males) with idiopathic DCM aged  $62 \pm 11$  y.o. were included. Baseline characteristic: QRS  $164 \pm 18$  ms; EF  $27 \pm 5.2\%$ ; mitral regurgitation was severe in 22 pts, moderate in 27 pts and mild in 6 pts; 15 pts had type III diastolic dysfunction, 37 pts with type II diastolic dysfunction, 3 pts with type I diastolic dysfunction. Average follow-up was  $42 \pm 18$  months: all patients were responders, EF increased at  $37 \pm 7.9\%$ ; mitral regurgitation decreased in 38 pts (69%), diastolic profile improved in 36 pts (65%). Trapezoidal LA shape was documented in 31 (56%) patients. Atrial fibrillation was noted in 4 pts (7%) and cardioversion was needed. Non-sudden cardiac death occurred in 5 patients (9%), all deaths were noted in pts with severe LA vol, trapezoidal shape and type III diastolic dysfunction. Statistically significant LA reverse remodelling was noted regarding LA volume, but not shape.

**Conclusions:** RA/LV fusion CRT pacing was associated with important LA reverse remodelling and a low incidence of AF. Larger randomised studies are needed to validate these results and assess the role of LA shape remodelling in CRT.

|                                           | before RA/LV CRT-P | Follow-up $42 \pm 18$ months | p         |
|-------------------------------------------|--------------------|------------------------------|-----------|
| LV EF, %, mean $\pm$ SD                   | $27 \pm 5.2$       | $37 \pm 7.9$                 | $<0.0001$ |
| LA diameter (mm), mean $\pm$ SD           | $50 \pm 4.9$       | $44 \pm 2.8$                 | $<0.0001$ |
| LA area (cm <sup>2</sup> ), mean $\pm$ SD | $24 \pm 5.6$       | $22 \pm 0.7$                 | 0.0138    |
| LA volume (ml), mean $\pm$ SD             | $104.9 \pm 34$     | $80 \pm 28.2$                | 0.0001    |

Abstract 416 Figure.

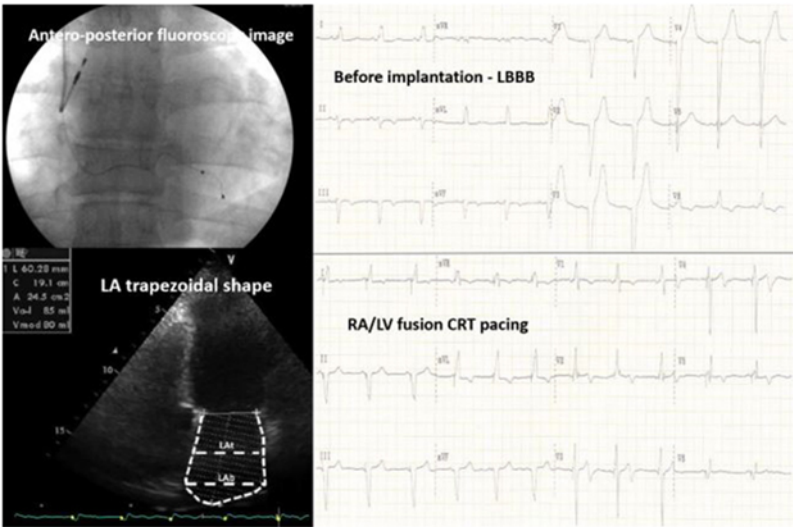

Source: http://academic.oup.com/ehjcimaging/article-pdf/21/Supplement_1/jez319.230/31865534/jez319.230.pdf
